# Supplementary material
Source: PubMed Central journal article supplement (PMC4420713)
Supplement: NIHMS670757-supplement-supplement.pdf [file NIHMS670757-supplement-supplement.pdf]

## Supplementary Online Content

Davis MA, Bynum JPW, Sirovich BE. Association between apple consumption and physician visits: appealing the conventional wisdom that an apple a day keeps the doctor away. Published online March 30, 2015. *JAMA Internal Medicine*. doi:10.1001/jamainternmed.2014.5466.

**eAppendix.** Codes From the U.S. Environmental Protection Agency's FCID Used to Identify Apple Consumption in the National Health and Nutrition Examination Survey

This supplementary material has been provided by the authors to give readers additional information about their work.

**eAppendix.** Codes From the U.S. Environmental Protection Agency's FCID Used to Identify Apple Consumption in the National Health and Nutrition Examination Survey.

---

| FCID Code | Description                   |
|-----------|-------------------------------|
| 110007000 | Apple, fruit with peel*       |
| 110008000 | Apple, peeled fruit*          |
| 110008001 | Apple, peeled fruit-baby food |
| 110009000 | Apple, dried                  |
| 110009001 | Apple, dried-baby food        |
| 110010000 | Apple, juice                  |
| 110010001 | Apple, juice-baby food        |
| 110011000 | Apple, sauce                  |
| 110011001 | Apple, sauce-baby food        |

---

Abbreviation: FCID, food commodity intake database.

\*Codes used in this study to identify apple eaters.
